# Supplementary material
Source: PubMed Central journal article supplement (PMC1470662)
Supplement: NIHMS8933-supplement-Sup_Fig2.pdf [file NIHMS8933-supplement-Sup_Fig2.pdf]

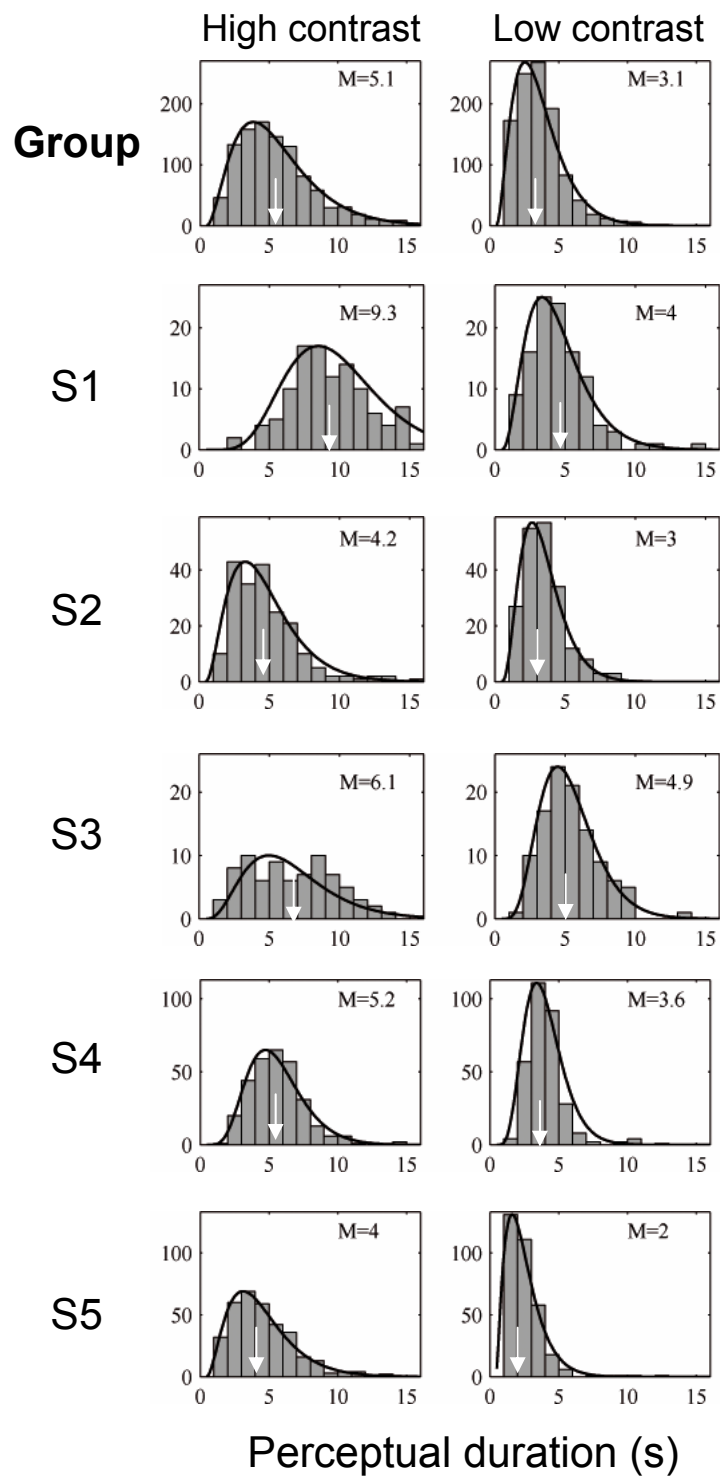

**Supplemental Figure 2. Behavioral results.** Statistical distributions of the perceptual durations of high-contrast and low-contrast gratings for individual subjects (S1–S5) and for the group. The experimental data were obtained during the rivalry scan sessions. The histograms were fitted with gamma functions shown superimposed. Arrows indicate the means of the distributions, with the high-contrast grating being perceived longer than the low-contrast grating.
