# Supplementary material
Source: PubMed Central journal article supplement (PMC1470662)
Supplement: NIHMS8933-supplement-Sup_Fig3.pdf [file NIHMS8933-supplement-Sup_Fig3.pdf]

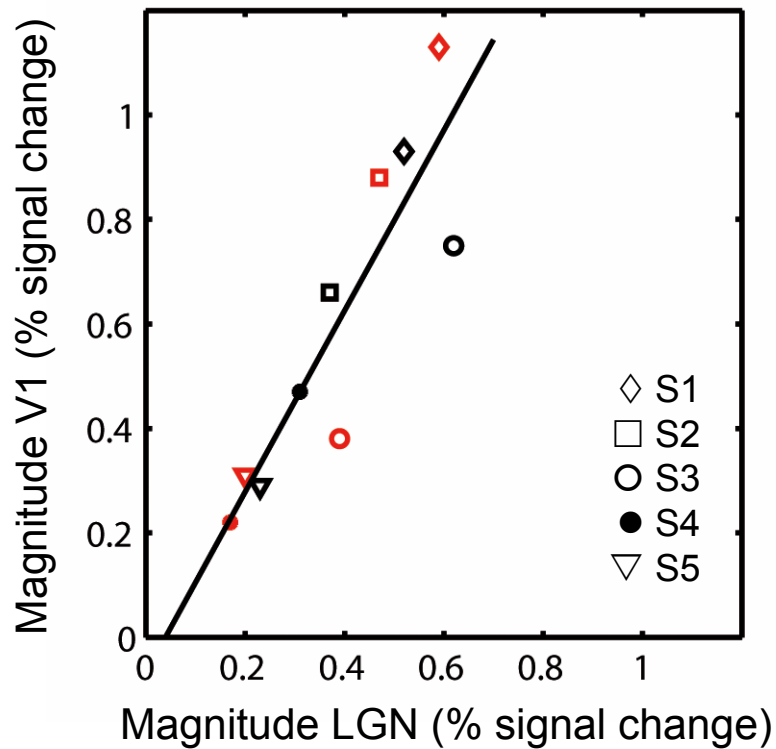

**Supplemental Figure 3.** *fMRI signal amplitudes in LGN and V1 during rivalry (red) and physical alternations (black).* The amplitudes of fMRI signals in LGN and V1, as defined by the maximum peak-to-trough signal difference following a transition between the perception of the high- or low-contrast stimulus, were strongly correlated in single subjects ( $r = .92, p < .03$ ). fMRI signals were about 50% stronger in V1 than in the LGN.
